# Supplementary material
Source: PubMed Central journal article supplement (PMC7777031)
Supplement: pnas.2009997117.sapp.pdf [file pnas.2009997117.sapp.pdf]

**Supporting Information for  
Post-transcriptional tuning of FGF signaling mediates neural crest induction**

Jacqueline Copeland and Marcos Simoes-Costa\*

Department of Molecular Biology and Genetics, Cornell University, Ithaca, NY, USA. \*Corresponding author:

Marcos Simoes-Costa

Email: simoescosta@cornell.edu

**This PDF file includes:**

Figure S1-S5

Table S1-S3

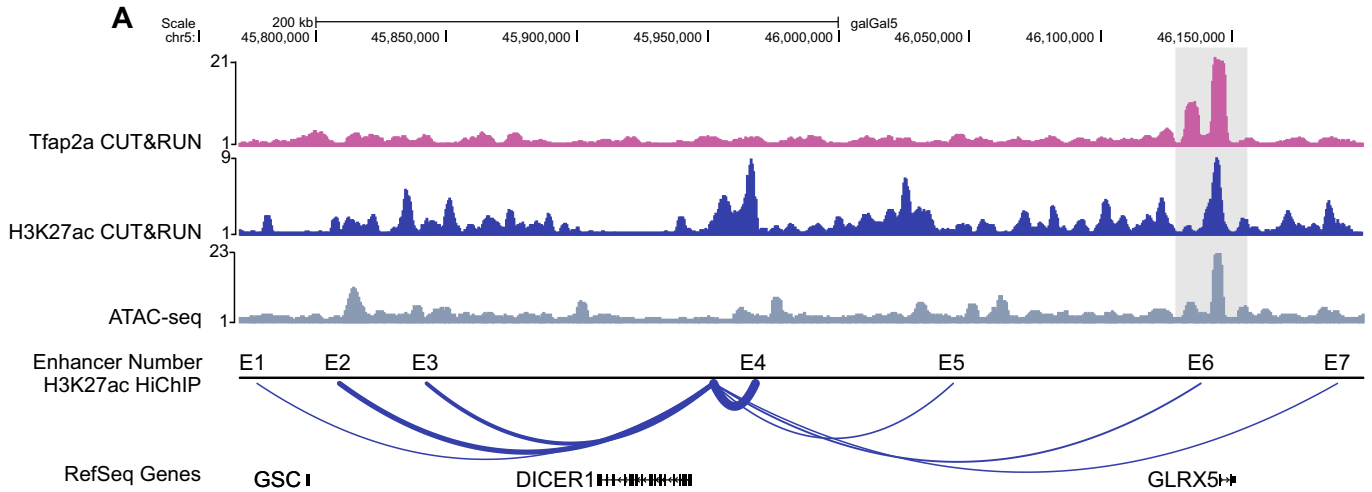

**B**

| Enhancer | Expression pattern  |
|----------|---------------------|
| E1       | No expression       |
| E2       | Neural              |
| E3       | Ectoderm            |
| E4       | Ectoderm            |
| E5       | No expression       |
| E6       | Neural Crest        |
| E7       | Neural/Neural Crest |

**Figure S1.** (Related to Figure 1) Putative DICER enhancers exhibit a broad range of ectodermal tissue specificity

**(A)** TFAP2A CUT&RUN, H3k27Ac CUT&RUN, ATAC-seq profiles and H3k27Ac Hi-ChIP arc plot at the DICER locus. Region encompasses all enhancer-promoter loops identified in H3k27Ac Hi-ChIP. Putative enhancers were determined by presence of loop and are labeled in order of ascending genomic coordinates. **(B)** Description of expression patterns for all DICER enhancers tested via transient transgenesis in the chick embryo. Expression patterns were determined based on co-localization with the neural crest reporter Tfp2aE1:mCherry.

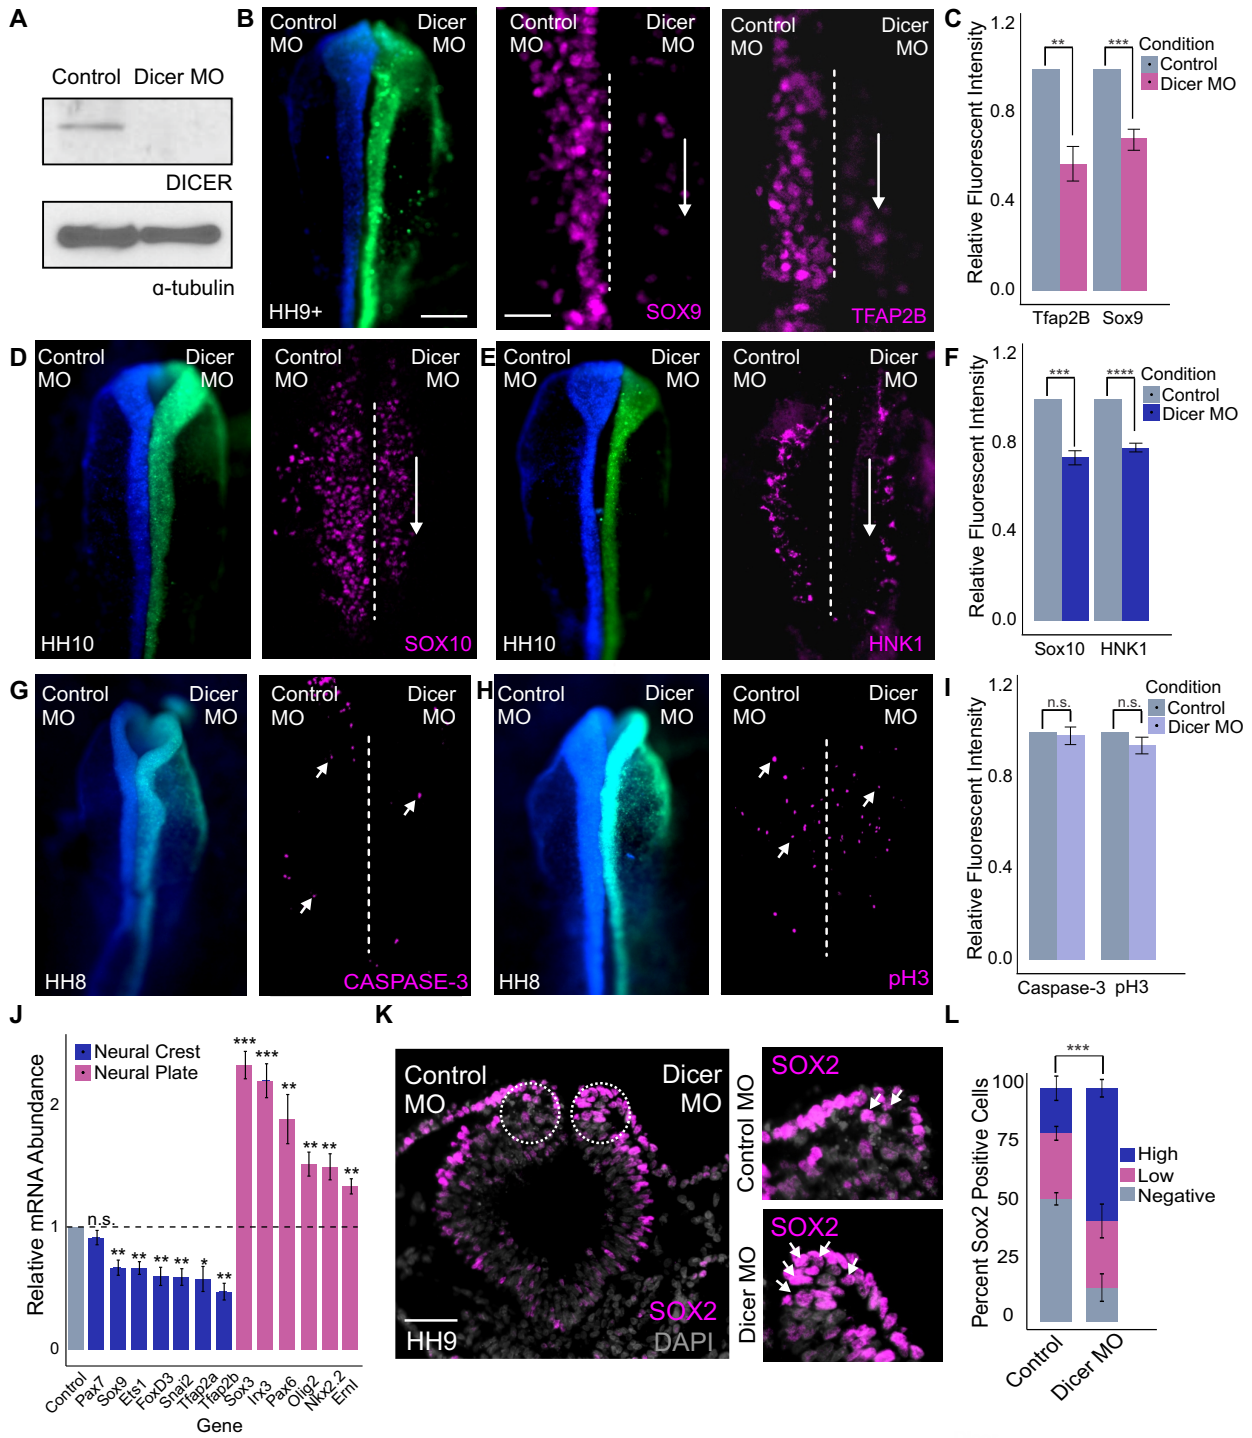

**Figure S2.** (Related to Figure 2) DICER knockdown controls and additional analysis of neural crest and neural plate markers upon DICER knockdown in avian embryos

**(A)** Western blot analysis revealed a decrease in DICER protein levels upon knockdown with translation inhibiting morpholino. **(B)** Dorsal whole mount view of HH9+ embryo with Control MO on the left and DICER MO on the right. Immunohistochemistry for neural crest markers TFAP2B and SOX9 upon DICER knockdown. Dotted line represents embryo midline. **(C)** Quantification of TFAP2B and SOX9-positive cells following DICER knockdown, normalized to the control side of the embryo (n=5). **(D)** Dorsal whole mount view of HH10 embryo with Control MO on the left and DICER MO on the right. Immunohistochemistry for

neural crest marker SOX10 upon DICER knockdown. Dotted line represents embryo midline. **(E)** Dorsal whole mount view of HH10 embryo with Control MO on the left and DICER MO on the right. Immunohistochemistry for neural crest marker HNK1 upon DICER knockdown. Dotted line represents embryo midline. **(F)** Quantification of SOX10 and HNK1-positive cells following DICER knockdown, normalized to the control side of the embryo (n=5). **(G)** Dorsal whole mount view of HH8 embryo with Control MO on the left and DICER MO on the right. Immunohistochemistry for cell death marker CASPASE-3 upon DICER knockdown. Dotted line represents embryo midline. **(H)** Dorsal whole mount view of HH8 embryo with Control MO on the left and DICER MO on the right. Immunohistochemistry for cell proliferation marker phospho-histone H3 upon DICER knockdown. Dotted line represents embryo midline. **(I)** Quantification of fluorescence revealed no change in cell death (Caspase-3) or proliferation (pH3) upon DICER knockdown (n=5). **(J)** Quantitative RT-PCR for select neural crest and neural plate genes in embryos electroporated with DICER morpholino. Phenotypes were assayed at stage HH8, comparing control to experimental sides of the embryo (n=6). **(K)** Immunohistochemistry (transverse section) for neural plate marker SOX2 at HH9 upon DICER knockdown. Dotted lines highlight differences in high intensity SOX2-positive cells (arrows) in control and DICER MO sides of the embryo. **(L)** Quantification of SOX2-positive (low and high intensity) and negative cells in the top  $\frac{1}{4}$  of the dorsal neural tube upon DICER knockdown, as compared to the control. P-value represents students t-test comparing percentage of high intensity SOX2-positive cells between control and DICER MO sides of the embryo (n=5). Error bars in (C), (F), (I), (J), and (L) represent standard deviation. Arrowheads in (B), (D), (E), and (G) represent a decrease in marker expression upon knockdown. MO: morpholino, n.s.: not significant. Scale bars, 200uM in (B, D, E, G, and H) dorsal whole mount view of embryo with Control MO on the left and DICER MO on the right, 100uM in (B, D, E, G, and H) immunohistochemistry for neural crest markers, 50uM in (K).

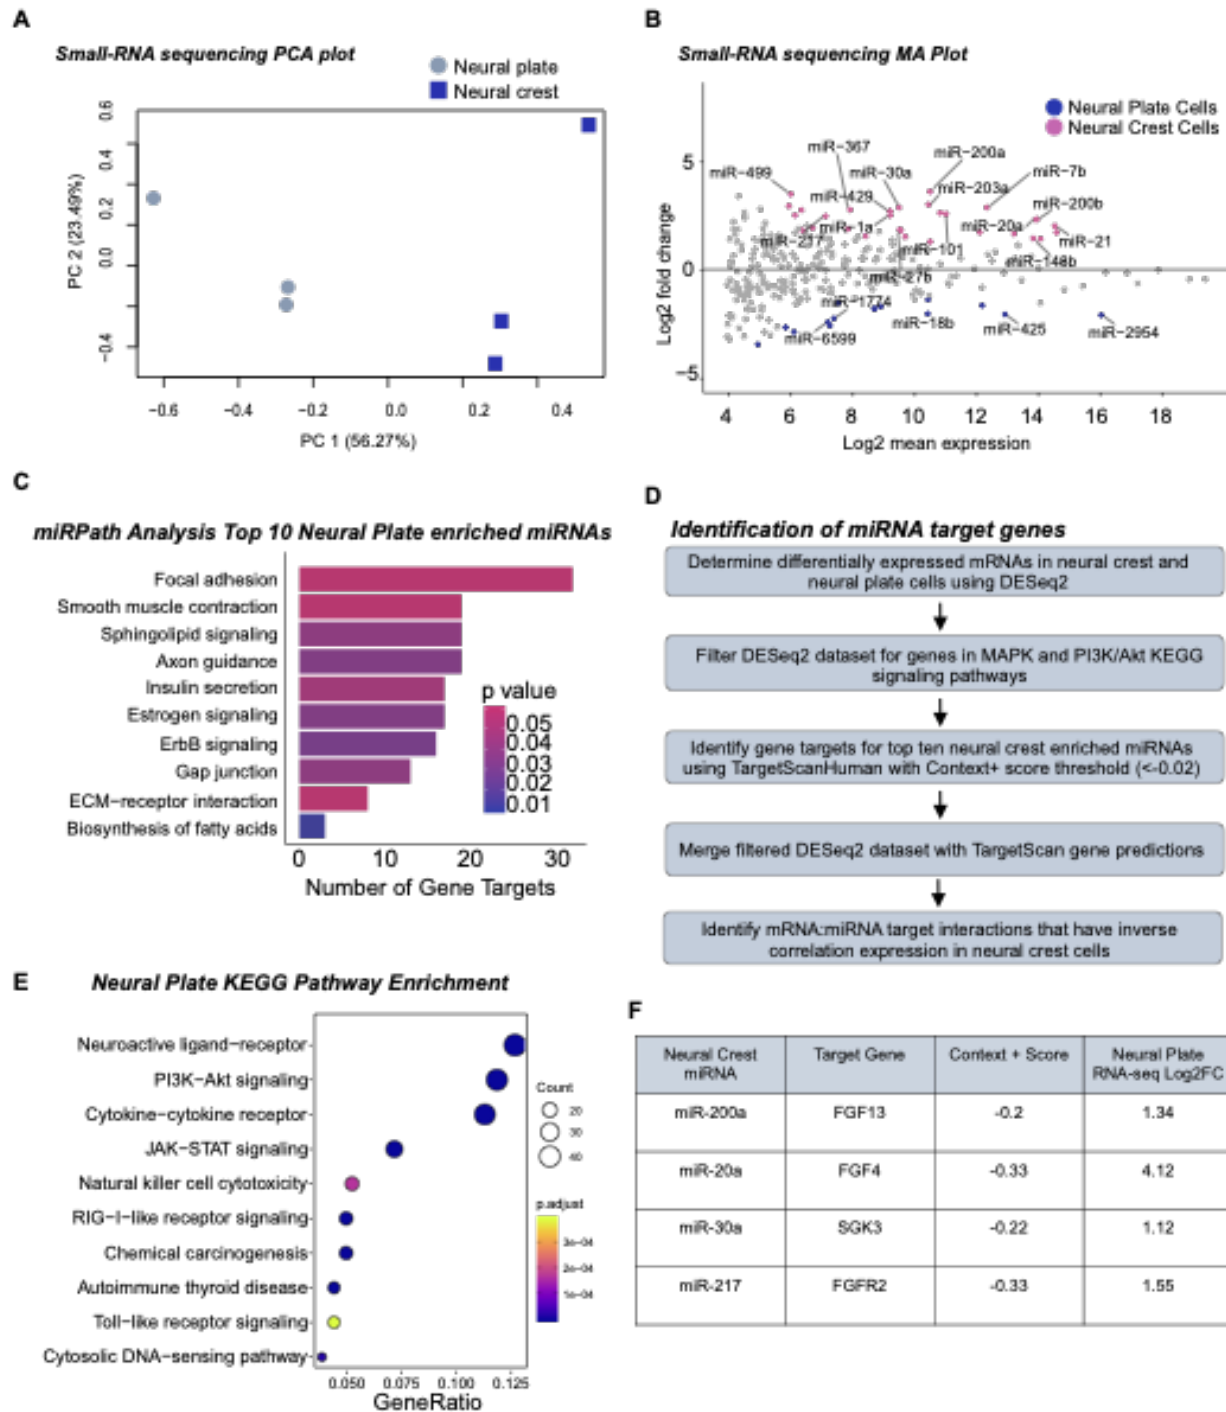

**Figure S3.** (Related to Figure 3) Additional analysis of small RNA-sequencing libraries and target identification. **(A)** Principal component analysis for neural crest and neural plate small RNA-sequencing libraries (n=3). **(B)** MA-plot from differential miRNA expression analysis between the neural crest and neural plate. Significant differentially expressed miRNAs were labeled based on FDR = 0.05, Log2 fold change > 1, padj < 0.05. **(C)** miRPath analysis for top ten neural plate enriched miRNAs. The plot shows the top ten KEGG pathways identified in this analysis. **(D)** Description of pipeline used to identify neural crest miRNA gene targets. **(E)** KEGG pathway enrichment analysis for neural plate enriched mRNAs shows upregulation of genes associated with FGF signaling cascades (PI3K-Akt and JAK-STAT). **(F)** Confidently predicted miRNA:mRNA target interactions based on analysis pipeline in Fig. S3D.

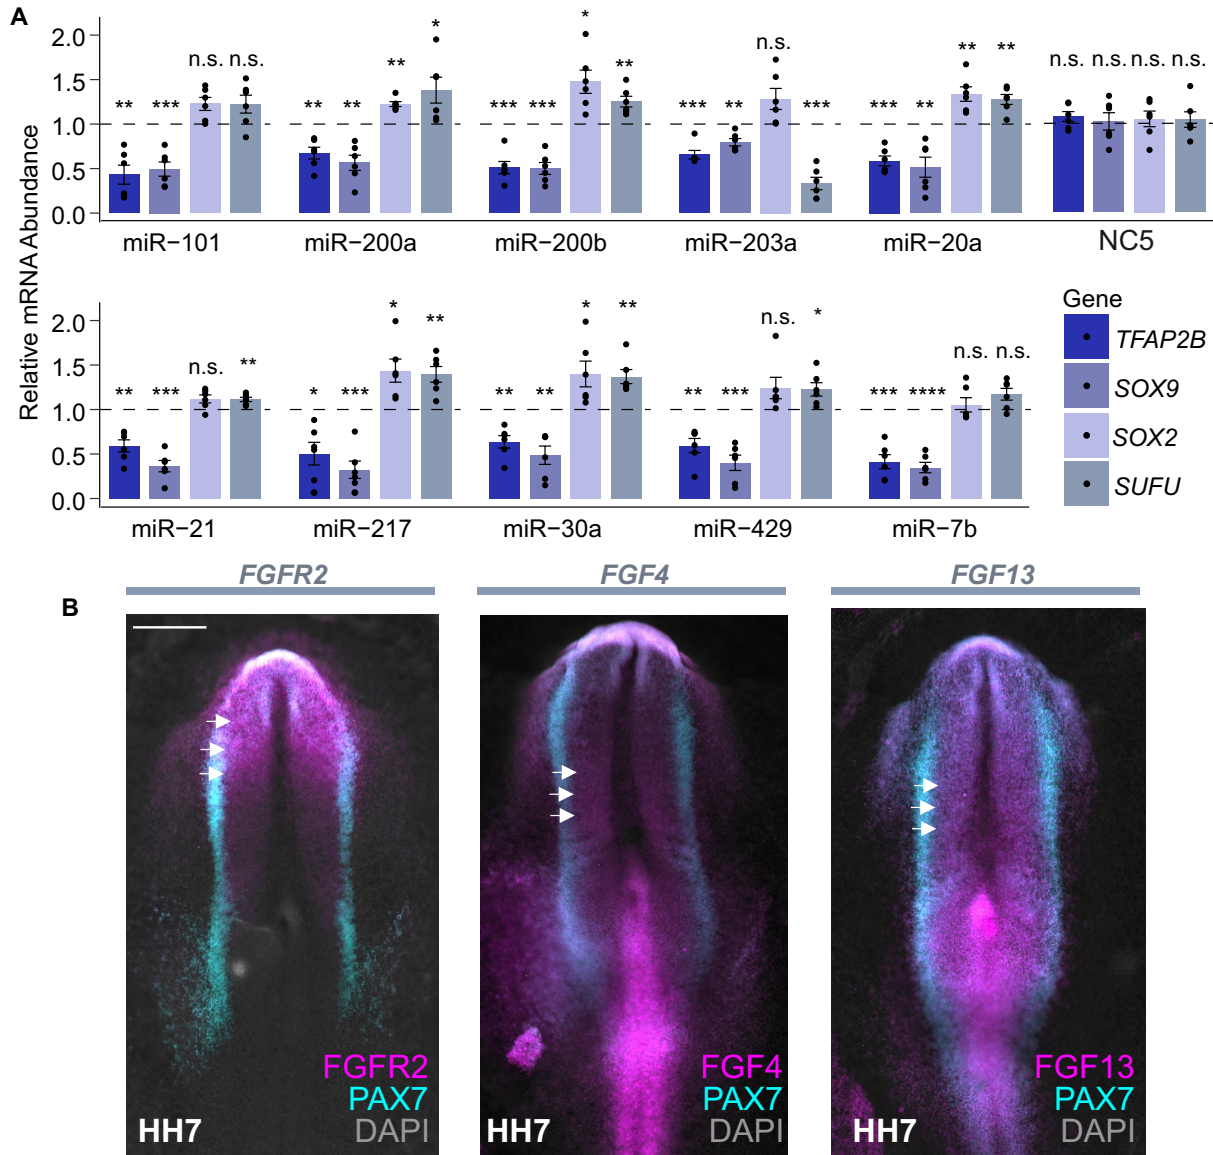

**Figure S4.** (Related to Figure 4) Additional neural crest miRNAs screened for DICER knockdown related phenotypes and candidate miRNA target gene expression patterns in avian embryos

**(A)** Quantitative RT-PCR for neural crest genes *TFAP2B* and *SOX9* and neural plate genes *SOX2* and *SUFU* upon miRNA loss-of-function for the top ten significantly enriched neural crest miRNAs (n=6). **(B)** Dorsal whole mount view of chicken embryos from double fluorescent in situ hybridization for each miRNA target gene (*FGFR2*, *FGF4*, or *FGF13*) and *PAX7* at developmental stage HH7. miRNA target genes are enriched in the neural plate, having low co-localization with the neural plate border marker *PAX7*. Error bars in (A) represent standard deviation. Arrowheads in (B) denote the neural plate border. Scale bars, 500 $\mu$ m in (B).

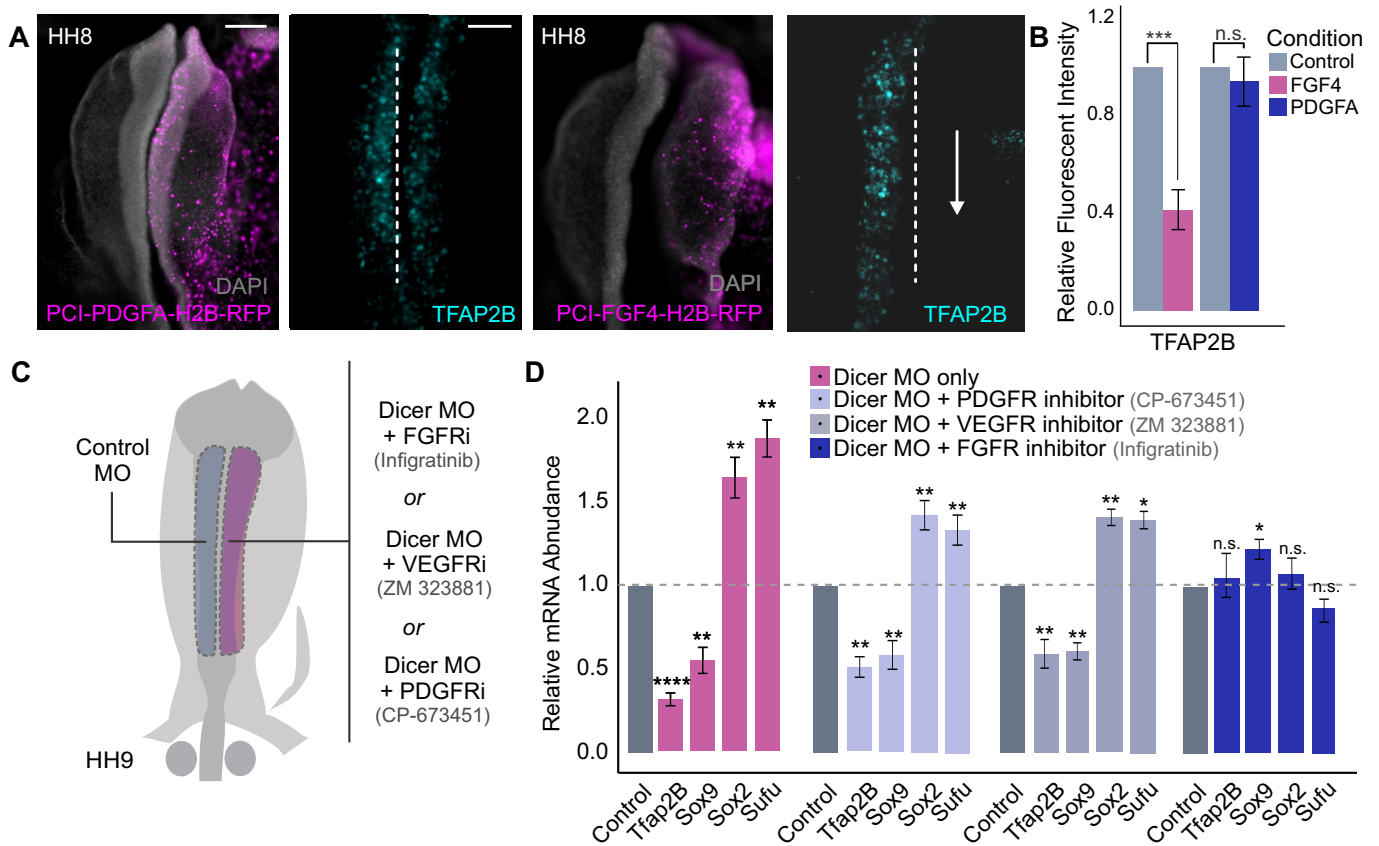

**Figure S5.** (Related to Figure 5) Manipulation of FGF signaling alters DICER knockdown phenotype as compared to manipulation of other RTK signaling pathways

**(A)** Dorsal whole mount view of HH8 embryos unilaterally transfected with PCI H2B RFP FGF4 or PCI H2B RFP PDGFA overexpression constructs. Immunohistochemistry for neural crest marker TFAP2B upon overexpression. Dotted line represents embryo midline. **(B)** Quantification of TFAP2B positive cells following overexpression of FGF4 or PDGFA, normalized to the control side of the embryo (n=6). **(C)** Electroporation scheme for DICER MO rescue experiments. **(D)** Quantitative RT-PCR for neural crest specification genes *TFAP2B* and *SOX9* and neural plate genes *SOX2* and *SUFU* in embryos electroporated with DICER MO alone or rescued by incubation with either FGFR1/2/3 inhibitor (Infigratinib), VEGFR2 inhibitor (ZM 323881), or PDGFR $\alpha/\beta$  inhibitor (CP-673451). Each experimental condition was normalized to the control side of bilaterally electroporated embryos for that given condition (n=6). Error bars in (B) and (D) represent the standard deviation. Arrowheads in (A) represent a decrease in marker expression upon perturbation. HH: Hamburger Hamilton, n.s.: not significant, MO: morpholino \* $P \leq 0.05$ , \*\* $P \leq 0.01$ , \*\*\* $P \leq 0.001$ , \*\*\*\* $P \leq 0.0001$ . Scale bars, 200uM in (A) dorsal whole mount view of embryo with control on the left and experimental condition on the right, 100uM in (A) immunohistochemistry for TFAP2B.



**Table S1.** H3K27Ac Hi-ChIP enhancer-promoter contact locations in the DICER locus.

| Loop Position | Enhancer side of loop (bp) | Promoter side of loop (bp) | Enhancer Designation | Loop logFC |
|---------------|----------------------------|----------------------------|----------------------|------------|
| Chromosome 5  | 46166839                   | 46213256                   | DicerE1              | 1.33       |
| Chromosome 5  | 45772137                   | 45782937                   | DicerE2              | 1.0        |
| Chromosome 5  | 45825755                   | 45858813                   | DicerE3              | 0.94       |
| Chromosome 5  | 45793675                   | 45824322                   | DicerE4              | 0.91       |
| Chromosome 5  | 45961494                   | 45974179                   | DicerE5              | 0.72       |
| Chromosome 5  | 46127097                   | 46148620                   | DicerE6              | 0.68       |
| Chromosome 5  | 46034137                   | 46052549                   | DicerE7              | 0.63       |

**Table S2.** Number of biological replicates and p-values for quantitative experiments.

| Experiment                                                 | No. of replicates/embryos                                        | p-value      | Figure   |
|------------------------------------------------------------|------------------------------------------------------------------|--------------|----------|
| <b>miRNA biogenesis enzymes qPCR</b>                       | 5 replicates/gene/stage<br>1 replicate=1,000 GFP+/- sorted cells |              |          |
| Dicer HH8                                                  |                                                                  | 0.03         | Fig 1D   |
| Dicer HH10                                                 |                                                                  | 0.139        | Fig 1D   |
| Drosha HH8                                                 |                                                                  | 0.04439      | Fig 1D   |
| Drosha HH10                                                |                                                                  | 0.1116       | Fig 1D   |
| Ago2 HH8                                                   |                                                                  | 0.1416       | Fig 1D   |
| Ago2 HH10                                                  |                                                                  | 0.1116       | Fig 1D   |
| <b>Dicer single cell suspension immunohistochemistry</b>   | 10 embryo heads/sample                                           | p < 1.00e-04 | Fig 1E   |
| <b>Dicer enhancer loss-of-function assay qPCR</b>          | 3 independent replicates<br>1 replicate=100 GFP+/- sorted cells  |              |          |
| Dicer                                                      |                                                                  | 0.0285       | Fig 1I   |
| <b>Dicer knockdown immunohistochemistry quantification</b> | 5 embryos/immunostaining                                         |              |          |
| Ap2B HH8                                                   |                                                                  | 9.86E-05     | Fig 2A-B |
| Sox9 HH8                                                   |                                                                  | 0.00381      | Fig 2A-B |



|                                                                             |                                                                                  |                                                |            |
|-----------------------------------------------------------------------------|----------------------------------------------------------------------------------|------------------------------------------------|------------|
| Ap2B HH9                                                                    |                                                                                  | 0.002767                                       | Fig S2B-C  |
| Sox9 HH9                                                                    |                                                                                  | 0.001163                                       | Fig S2B-C  |
| Sox10 HH10                                                                  |                                                                                  | 0.0003209                                      | FigS2D, F  |
| HNK1 HH10                                                                   |                                                                                  | 7.883e-05                                      | FigS2E, F  |
| Caspase-3                                                                   |                                                                                  | 0.9822                                         | Fig S2G, I |
| pH3                                                                         |                                                                                  | 0.3621                                         | Fig S2H, I |
| Sox2 HH8                                                                    |                                                                                  | Control High vs<br>Dicer MO High=<br>0.0001352 | Fig 2G-H   |
| Sox2 HH8                                                                    |                                                                                  | Control Low vs<br>Dicer MO Low =<br>0.000437   | Fig 2G-H   |
| Sox2 HH8                                                                    |                                                                                  | Control Neg vs<br>Dicer MO Neg =<br>0.01677    | Fig 2G-H   |
| Sox2 HH9                                                                    |                                                                                  | Control High vs<br>Dicer MO High=<br>0.0006557 | Fig S2K-L  |
| Sox2 HH9                                                                    |                                                                                  | Control Low vs<br>Dicer MO Low =<br>0.0319     | Fig S2K-L  |
| Sox2 HH9                                                                    |                                                                                  | Control Neg vs<br>Dicer MO Neg =<br>0.1047     | Fig S2K-L  |
| <b>Dicer knockdown qPCR for<br/>neural crest and neural plate<br/>genes</b> | 5 replicates/condition/gene<br>1 replicate = 1 bilaterally transfected<br>embryo |                                                |            |
| Pax7                                                                        |                                                                                  | 0.2118                                         | FigS2J     |
| Sox9                                                                        |                                                                                  | 0.005788                                       | FigS2J     |
| Ets1                                                                        |                                                                                  | 0.002922                                       | FigS2J     |
| FoxD3                                                                       |                                                                                  | 0.005529                                       | FigS2J     |
| Snai2                                                                       |                                                                                  | 0.00384                                        | FigS2J     |
| Tfap2a                                                                      |                                                                                  | 0.01421                                        | FigS2J     |
| Tfap2B                                                                      |                                                                                  | 0.001493                                       | FigS2J     |
| Sox3                                                                        |                                                                                  | 0.0002941                                      | FigS2J     |
| Irx3                                                                        |                                                                                  | 0.0009952                                      | FigS2J     |

|                                                  |                                                                               |           |        |
|--------------------------------------------------|-------------------------------------------------------------------------------|-----------|--------|
| Pax6                                             |                                                                               | 0.01184   | FigS2J |
| Olig2                                            |                                                                               | 0.006345  | FigS2J |
| Nkx2.2                                           |                                                                               | 0.009916  | FigS2J |
| Ernl                                             |                                                                               | 0.005921  | FigS2J |
| <b>Dicer MUT/WT rescue qPCR</b>                  | 5 replicates/condition/gene<br>1 replicate = 1 bilaterally transfected embryo |           |        |
| Ap2B-mutant                                      |                                                                               | 0.0298    | Fig 2C |
| Ap2B-WT                                          |                                                                               | 0.03027   | Fig 2C |
| FoxD3-mutant                                     |                                                                               | 0.005175  | Fig 2C |
| FoxD3-WT                                         |                                                                               | 0.05286   | Fig 2C |
| Sox9-mutant                                      |                                                                               | 0.001102  | Fig 2C |
| Sox9-WT                                          |                                                                               | 0.05744   | Fig 2C |
| <b>miRNA qPCR</b>                                | 5 replicates/miRNA<br>1 replicate= 3,000 GFP-/+ sorted cells                  |           |        |
| miR-200a                                         |                                                                               | 0.01714   | Fig 3D |
| miR-200b                                         |                                                                               | 0.001592  | Fig 3D |
| miR-203a                                         |                                                                               | 0.004788  | Fig 3D |
| miR-30a                                          |                                                                               | 0.002435  | Fig 3D |
| miR-429                                          |                                                                               | 0.005544  | Fig 3D |
| miR-7b                                           |                                                                               | 0.005832  | Fig 3D |
| miR-217                                          |                                                                               | 0.03295   | Fig 3D |
| miR-21                                           |                                                                               | 0.003784  | Fig 3D |
| miR-20a                                          |                                                                               | 0.01237   | Fig 3D |
| miR-101                                          |                                                                               | 0.1845    | Fig 3D |
| miR-18b                                          |                                                                               | 0.0001192 | Fig 3D |
| <b>qPCR upon miRNA gain-and-loss-of-function</b> | 6 replicates/condition/gene<br>1 replicate = 1 bilaterally transfected embryo |           |        |
| Ap2B                                             | miR-200a GOF                                                                  | 0.2519    | Fig 4C |
| Sox9                                             |                                                                               | 0.06174   | Fig 4C |
| Sox2                                             |                                                                               | 0.01486   | Fig 4C |
| Sufu                                             |                                                                               | 9.22E-03  | Fig 4C |
| Ap2B                                             | miR-200a LOF                                                                  | 4.25E-03  | Fig 4B |
| Sox9                                             |                                                                               | 0.003771  | Fig 4B |
| Sox2                                             |                                                                               | 0.000435  | Fig 4B |
| Sufu                                             |                                                                               | 0.04702   | Fig 4B |

|                                         |                                                                               |           |         |
|-----------------------------------------|-------------------------------------------------------------------------------|-----------|---------|
| Ap2B                                    | miR-20a GOF                                                                   | 0.04489   | Fig 4C  |
| Sox9                                    |                                                                               | 0.01736   | Fig 4C  |
| Sox2                                    |                                                                               | 0.002046  | Fig 4C  |
| Sufu                                    |                                                                               | 0.0229    | Fig 4C  |
| Ap2B                                    | miR-20a LOF                                                                   | 0.0006973 | Fig 4B  |
| Sox9                                    |                                                                               | 0.007732  | Fig 4B  |
| Sox2                                    |                                                                               | 0.008913  | Fig 4B  |
| Sufu                                    |                                                                               | 0.004327  | Fig 4B  |
| Ap2B                                    | miR-217 GOF                                                                   | 0.02456   | Fig 4C  |
| Sox9                                    |                                                                               | 0.09155   | Fig 4C  |
| Sox2                                    |                                                                               | 0.00139   | Fig 4C  |
| Sufu                                    |                                                                               | 0.0004143 | Fig 4C  |
| Ap2B                                    | miR-217 LOF                                                                   | 0.01147   | Fig 4B  |
| Sox9                                    |                                                                               | 0.000957  | Fig 4B  |
| Sox2                                    |                                                                               | 0.02016   | Fig 4B  |
| Sufu                                    |                                                                               | 0.006467  | Fig 4B  |
| <b>qPCR upon miRNA loss-of-function</b> | 5 replicates/condition/gene<br>1 replicate = 1 bilaterally transfected embryo |           |         |
| Ap2B                                    | miR-101 LOF                                                                   | 0.003116  | Fig S4A |
| Sox9                                    |                                                                               | 0.001433  | Fig S4A |
| Sox2                                    |                                                                               | 0.02689   | Fig S4A |
| Sufu                                    |                                                                               | 0.0767    | Fig S4A |
| Ap2B                                    | miR-200a LOF                                                                  | 0.004248  | Fig S4A |
| Sox9                                    |                                                                               | 0.003771  | Fig S4A |
| Sox2                                    |                                                                               | 0.000435  | Fig S4A |
| Sufu                                    |                                                                               | 0.04702   | Fig S4A |
| Ap2B                                    | miR-200bLOF                                                                   | 0.0008324 | Fig S4A |
| Sox9                                    |                                                                               | 0.0006817 | Fig S4A |
| Sox2                                    |                                                                               | 0.01475   | Fig S4A |
| Sufu                                    |                                                                               | 0.008529  | Fig S4A |
| Ap2B                                    | miR-203a LOF                                                                  | 0.0008299 | Fig S4A |
| Sox9                                    |                                                                               | 0.00418   | Fig S4A |
| Sox2                                    |                                                                               | 0.06262   | Fig S4A |
| Sufu                                    |                                                                               | 0.0002114 | Fig S4A |
| Ap2B                                    | miR-20a LOF                                                                   | 0.0006973 | Fig S4A |
| Sox9                                    |                                                                               | 0.007732  | Fig S4A |
| Sox2                                    |                                                                               | 0.008913  | Fig S4A |
| Sufu                                    |                                                                               | 0.004327  | Fig S4A |
| Ap2B                                    | miR-21 LOF                                                                    | 0.001869  | Fig S4A |

|                                                                   |                                                                               |           |         |
|-------------------------------------------------------------------|-------------------------------------------------------------------------------|-----------|---------|
| Sox9                                                              |                                                                               | 0.0001751 | Fig S4A |
| Sox2                                                              |                                                                               | 0.05532   | Fig S4A |
| Sufu                                                              |                                                                               | 0.005038  | Fig S4A |
| Ap2B                                                              | miR-217 LOF                                                                   | 0.01147   | Fig S4A |
| Sox9                                                              |                                                                               | 0.000957  | Fig S4A |
| Sox2                                                              |                                                                               | 0.02016   | Fig S4A |
| Sufu                                                              |                                                                               | 0.006467  | Fig S4A |
| Ap2B                                                              | miR-30a LOF                                                                   | 0.003399  | Fig S4A |
| Sox9                                                              |                                                                               | 0.004122  | Fig S4A |
| Sox2                                                              |                                                                               | 0.03991   | Fig S4A |
| Sufu                                                              |                                                                               | 0.005429  | Fig S4A |
| Ap2B                                                              | miR-429 LOF                                                                   | 0.003815  | Fig S4A |
| Sox9                                                              |                                                                               | 0.0009412 | Fig S4A |
| Sox2                                                              |                                                                               | 0.1006    | Fig S4A |
| Sufu                                                              |                                                                               | 0.04939   | Fig S4A |
| Ap2B                                                              | miR-7b LOF                                                                    | 0.0007051 | Fig S4A |
| Sox9                                                              |                                                                               | 9.99E-05  | Fig S4A |
| Sox2                                                              |                                                                               | 0.5422    | Fig S4A |
| Sufu                                                              |                                                                               | 0.05865   | Fig S4A |
| Ap2B                                                              | NC5 neg control                                                               | 0.2304    | Fig S4A |
| Sox9                                                              |                                                                               | 0.8308    | Fig S4A |
| Sox2                                                              |                                                                               | 0.5966    | Fig S4A |
| Sufu                                                              |                                                                               | 0.6556    | Fig S4A |
| <b>qPCR for target genes upon miRNA loss-and-gain-of-function</b> | 5 replicates/condition/gene<br>1 replicate = 1 bilaterally transfected embryo |           |         |
| SGK3                                                              | miR-30a LOF                                                                   | 0.111     | Fig 4E  |
| AKT3                                                              | miR-30a LOF                                                                   | 0.9715    | Fig 4E  |
| FGF4                                                              | miR-20a LOF                                                                   | 0.0008305 | Fig 4E  |
| FGF13                                                             | miR-200a LOF                                                                  | 0.0009129 | Fig 4E  |
| FGFR2                                                             | miR-217 LOF                                                                   | 0.04482   | Fig 4E  |
| FGF4                                                              | miR-20a GOF                                                                   | 0.005547  | Fig 4F  |
| FGF13                                                             | miR-200a GOF                                                                  | 0.003863  | Fig 4F  |
| FGFR2                                                             | miR-217 GOF                                                                   | 0.00175   | Fig 4F  |
| FGF4                                                              | NC5 control                                                                   | 0.3179    | Fig 4F  |
| FGF13                                                             | NC5 control                                                                   | 0.3205    | Fig 4F  |
| FGFR2                                                             | NC5 control                                                                   | 0.2064    | Fig 4F  |
| <b>Dual luciferase 3'UTR reporter assays</b>                      | 3 individual replicates/condition (3 technical replicates each)               |           |         |

|                                                                |                                                                               |           |           |
|----------------------------------------------------------------|-------------------------------------------------------------------------------|-----------|-----------|
| FGF4                                                           | miR-20a mimic/control                                                         | 0.01479   | Fig 4H    |
| FGF13                                                          | miR-200a mimic/control                                                        | 0.02796   | Fig 4H    |
| FGFR2                                                          | miR-217 mimic/control                                                         | 0.008378  | Fig 4H    |
| FGF4                                                           | miR-20a WT/Mutant                                                             | 0.002929  | Fig 4I    |
| FGF13                                                          | miR-200a WT/Mutant                                                            | 0.003736  | Fig 4I    |
| FGFR2                                                          | miR-217 WT/Mutant                                                             | 0.01391   | Fig 4I    |
| <b>Western blot quantification upon Dicer knockdown</b>        | 3 individual replicates                                                       |           |           |
| dpERK1/2                                                       |                                                                               | 0.01013   | Fig 5B-C  |
| pAkt1/2/3                                                      |                                                                               | 0.9612    | Fig 5D-E  |
| <b>N2:eGFP enhancer fluorescent intensity quantification</b>   |                                                                               |           |           |
| miRNA inhibitor                                                |                                                                               | 0.01053   | Fig 5G-H  |
| miRNA mimic                                                    |                                                                               | 0.003401  | Fig 5G-H  |
| <b>FGF4/PDGFA overexpression qPCR analysis</b>                 |                                                                               |           |           |
| Tfap2B                                                         | pCI-H2B-RFP-FGF4                                                              | 1.363e-05 | Fig 5I    |
| Sox9                                                           | pCI-H2B-RFP-FGF4                                                              | 0.0001364 | Fig 5I    |
| Sox2                                                           | pCI-H2B-RFP-FGF4                                                              | 0.01028   | Fig 5I    |
| Sufu                                                           | pCI-H2B-RFP-FGF4                                                              | 0.003127  | Fig 5I    |
| Tfap2B                                                         | pCI-H2B-RFP-PDGFA                                                             | 0.8684    | Fig 5I    |
| Sox9                                                           | pCI-H2B-RFP-PDGFA                                                             | 0.3875    | Fig 5I    |
| Sox2                                                           | pCI-H2B-RFP-PDGFA                                                             | 0.3675    | Fig 5I    |
| Sufu                                                           | pCI-H2B-RFP-PDGFA                                                             | 0.1133    | Fig 5I    |
| <b>FGF4/PDGFA overexpression immunohistochemistry analysis</b> |                                                                               |           |           |
| Tfap2B                                                         | pCI-H2B-RFP-FGF4                                                              | 0.0008537 | Fig S5A-B |
| Tfap2B                                                         | pCI-H2B-RFP-PDGFA                                                             | 0.602     | Fig S5A-B |
| <b>Dicer knockdown rescue experiments</b>                      | 6 replicates/condition/gene<br>1 replicate = 1 bilaterally transfected embryo |           |           |
| Ap2B                                                           | Dicer MO only                                                                 | 5.58E-05  | Fig 5K    |
| Sox9                                                           |                                                                               | 0.001966  | Fig 5K    |
| Sox2                                                           |                                                                               | 0.006462  | Fig 5K    |
| Sufu                                                           |                                                                               | 0.001437  | Fig 5K    |
| Ap2B                                                           | Dicer MO + SU5402 inhibitor                                                   | 0.08349   | Fig 5K    |
| Sox9                                                           |                                                                               | 0.5       | Fig 5K    |
| Sox2                                                           |                                                                               | 0.8691    | Fig 5K    |
| Sufu                                                           |                                                                               | 0.4728    | Fig 5K    |

|      |                                          |          |          |
|------|------------------------------------------|----------|----------|
| Ap2B | Dicer MO + miRNA mimic mix               | 0.05534  | Fig 5K   |
| Sox9 |                                          | 0.9401   | Fig 5K   |
| Sox2 |                                          | 0.2759   | Fig 5K   |
| Sufu |                                          | 0.8077   | Fig 5K   |
| Ap2B | Dicer MO + FGFR inhibitor (Infigratinib) | 0.7211   | FigS5C-D |
| Sox9 |                                          | 0.02476  | FigS5C-D |
| Sox2 |                                          | 0.5115   | FigS5C-D |
| Sufu |                                          | 0.07605  | FigS5C-D |
| Ap2B | Dicer MO + VEGFR inhibitor (ZM 323881)   | 0.007863 | FigS5C-D |
| Sox9 |                                          | 0.001399 | FigS5C-D |
| Sox2 |                                          | 0.001343 | FigS5C-D |
| Sufu |                                          | 0.001786 | FigS5C-D |
| Ap2B | Dicer MO + PDGFR inhibitor (CP-673451)   | 0.00118  | FigS5C-D |
| Sox9 |                                          | 0.007359 | FigS5C-D |
| Sox2 |                                          | 0.00944  | FigS5C-D |
| Sufu |                                          | 0.02037  | FigS5C-D |

**Table S3.** Custom reagents utilized in this study

| Resource               | Designation               | Source or reference    | Sequence                     | Additional information      |
|------------------------|---------------------------|------------------------|------------------------------|-----------------------------|
| Sequence based reagent | Dicer Morpholino          | Genetools (this paper) | 5'TGCAAAGCAGGGCTT3'          |                             |
| Sequence based reagent | gga-miR-200a-3p inhibitor | IDT (this paper)       | 5'UAACACUGUCUGGUAACGAUGU'3   | Detailed in Methods section |
| Sequence based reagent | gga-miR-20a-5p inhibitor  | IDT (this paper)       | 5'UAAAGUGCUUUAUGUGCAGGUAG'3  | Detailed in Methods section |
| Sequence based reagent | gga-miR-217-5p inhibitor  | IDT (this paper)       | 5'UACUGCAUCAGGAACUGAUUGGAU'3 | Detailed in Methods section |
| Sequence based reagent | gga-miR-101-3p inhibitor  | IDT (this paper)       | 5'GUACAGUACUGUGUAACUGAA'3    | Detailed in Methods section |
| Sequence based reagent | gga-miR-200b-3p inhibitor | IDT (this paper)       | 5' UAAUACUGCCUGGUAUUGAUGAU'3 | Detailed in Methods section |
| Sequence based reagent | gga-miR-203a inhibitor    | IDT (this paper)       | 5' GUGAAAUGUUUAGGACCACUUG'3  | Detailed in Methods section |
| Sequence based reagent | gga-miR-21-3p inhibitor   | IDT (this paper)       | 5' CAACAACAGUCGGUAGGCUGUC'3  | Detailed in Methods section |
| Sequence based reagent | gga-miR-30a-5p inhibitor  | IDT (this paper)       | 5' UGUAAACAUCCUCGACUGGAAG'3  | Detailed in Methods section |
| Sequence based reagent | gga-miR-429-3p inhibitor  | IDT (this paper)       | 5' UAAUACUGUCUGGUAUUGCCGU'3  | Detailed in Methods section |
| Sequence based reagent | gga-miR-7b inhibitor      | IDT (this paper)       | 5' UGGAAGACUAGUGAUUUUUGUU'3  | Detailed in Methods section |
| Sequence based reagent | NC5 control inhibitor     | IDT (this paper)       | 5'ACCAUAUUGCGCGUAUAGUCGC'3   | Detailed in Methods section |
| Sequence based reagent | gga-miR-200a mimic        | Qiagen (this paper)    | 5'UAACACUGUCUGGUAACGAUGU'3   | Detailed in Methods section |
| Sequence based reagent | gga-miR-20a mimic         | Qiagen (this paper)    | 5'UAAAGUGCUUUAUGUGCAGGUAG'3  | Detailed in Methods section |
| Sequence based reagent | gga-miR-217 mimic         | Qiagen (this paper)    | 5'UACUGCAUCAGGAACUGAUUGGAU'3 | Detailed in Methods section |



| Sequence based reagent | AllStars Negative Control siRNA | Qiagen (this paper) |  | Predesigned/validated by Affymetrix GeneChip Array and cell-based assays                                                 |
|------------------------|---------------------------------|---------------------|--|--------------------------------------------------------------------------------------------------------------------------|
| Chemical               | SU5402                          | Sigma               |  | SU5402 is a potent multi-targeted receptor tyrosine kinase inhibitor for VEGFR2, FGFR1, and PDGF-R $\beta$ Cat # SML0443 |
| Chemical               | Infigratinib (BGJ398)           | SelleckChem         |  | Potent and selective FGFR 1/2/3 inhibitor Cat # S2183                                                                    |
| Chemical               | CP-673451                       | SelleckChem         |  | CP-673451 is a selective inhibitor of PDGFR $\alpha$ / $\beta$ Cat # S1536                                               |
| Chemical               | ZM 323881                       | SelleckChem         |  | ZM 323881 is a potent and selective VEGFR2 inhibitor Cat # S2896                                                         |
